# Supplementary material for: Microfluidic Device for Droplet Pairing by Combining Droplet Railing and Floating Trap Arrays
Source: Micromachines (Basel). 2021 Sep 6;12(9):1076. doi: 10.3390/mi12091076 (PMC8470175; doi:10.3390/mi12091076)
Supplement: Supplementary file 1 [file micromachines-12-01076-s001.zip]

Archive with 5 entries (5 files):
- Video S1.avi
- Video S2.avi
- Video S3.avi
- Video S4.avi
- micromachines-1349350 supplementary materials.pdf
